# Supplementary material for: Ecological Network Analysis of a Virtual Water System in Tibet, China
Source: MDPI journal article supplement (doi:10.3390/w13223246), 2021-11-16
Supplement: s1 [file s1]

Archive with 1 entries (1 files):
- water-1445913-supplementary.pdf
