# Supplementary material for: Ecological Network Analysis of a Virtual Water System in Tibet, China
Source: MDPI journal article supplement (doi:10.3390/w13223246), 2021-11-16
Supplement: s1 [file s1 › water-1445913-supplementary.pdf]

**Table S1.** Aggregation of sectors in the input-output table.

| Original 42 sectors                                            | Aggregated 7 sectors | Original 42 sectors                                              | Aggregated 7 sectors          |
|----------------------------------------------------------------|----------------------|------------------------------------------------------------------|-------------------------------|
| 1 Agriculture, forestry, animal husbandry and fishery          | 1 Agriculture (AG)   | 22 Scrap and waste                                               |                               |
| 2 Coal mining and dressing                                     | 2 Mining (MI)        | 23 Electricity, steam and hot water production and supply        | 4 Energy supply (ES)          |
| 3 Petroleum and natural gas extraction                         |                      | 24 Gas production and supply                                     |                               |
| 4 Metal ore mining                                             |                      | 25 Water production and supply                                   | 5 Water supply (WS)           |
| 5 Non-metal minerals mining                                    |                      | 26 Construction                                                  | 6 Construction (CO)           |
| 6 Manufacture of food products and tobacco processing          | 3 Manufacturing (MA) | 27 Transport and storage                                         | 7 Services and transport (ST) |
| 7 Textiles                                                     |                      | 28 Post services                                                 |                               |
| 8 Wearing apparel, leather, fur, down and related products     |                      | 29 Telecommunication, computer services and software             |                               |
| 9 Sawmills and furniture                                       |                      | 30 Wholesale and retail trade services                           |                               |
| 10 Paper and products, printing and record medium reproduction |                      | 31 Accommodation and food serving services                       |                               |
| 11 Petroleum processing, coking and nuclear fuel processing    |                      | 32 Finance and insurance                                         |                               |
| 12 Chemical industry                                           |                      | 33 Real estate                                                   |                               |
| 13 Nonmetallic mineral products                                |                      | 34 Rental and business services                                  |                               |
| 14 Metal smelting and pressing                                 |                      | 35 Scientific research                                           |                               |
| 15 Metal products                                              |                      | 36 Poly technical services                                       |                               |
| 16 General and special purpose machinery                       |                      | 37 Water resources, environment and public facilities management |                               |
| 17 Transport equipment                                         |                      | 38 Residential services and other social services                |                               |
| 18 Electric equipment and machinery                            |                      | 39 Educational services                                          |                               |
| 19 Electronic and telecommunication equipment                  |                      | 40 Health, social security and welfare                           |                               |
| 20 Instruments, meters, cultural and office machinery          |                      | 41 Cultural, sporting and recreational services                  |                               |
| 21 Art ware and other manufacturing products                   |                      | 42 Public management and social organization                     |                               |

**Table S2.** The virtual water flows matrix of Tibet in 2012.

|          | Sector 1  | Sector 2 | Sector 3  | Sector 4 | Sector 5 | Sector 6   | Sector 7  |
|----------|-----------|----------|-----------|----------|----------|------------|-----------|
| Sector 1 | 78830.310 | 124.577  | 32249.176 | 0.003    | 0.001    | 2646.282   | 25021.137 |
| Sector 2 | 11.463    | 1391.477 | 747.553   | 0.007    | 2.043    | 2264.070   | 360.081   |
| Sector 3 | 5774.299  | 4592.453 | 11979.542 | 2079.541 | 44.980   | 164425.907 | 63949.059 |
| Sector 4 | 300.555   | 334.682  | 951.916   | 1229.885 | 75.196   | 775.836    | 3733.729  |
| Sector 5 | 701.995   | 58.923   | 424.306   | 69.396   | 1456.314 | 807.263    | 4897.849  |
| Sector 6 | 2.534     | 17.175   | 10.492    | 47.243   | 15.867   | 39628.297  | 4588.565  |
| Sector 7 | 570.800   | 803.000  | 1892.985  | 951.363  | 49.161   | 30970.451  | 34044.456 |

Note: Sector numbers are defined in Supplementary Table S1. (Unit:  $10^4 \text{ m}^3$ )
